# Supplementary material
Source: Research Square preprint supplement (doi:10.21203/rs.3.rs-10059470/v1)
Supplement: Supplementary file 1 [file f2ca60dad594d93fed029a5d.docx]

| **Spectral index** | **Wavelengths selected** | **Data source** | **Regression Equation** | **Type** | **R²** |
| --- | --- | --- | --- | --- | --- |
| DI | 703.9 e 2202.4 | S-2 | y = -1.09x + 0.41 | Soil | 0.06 |
| DI | 740.2 e 782.5 | S-2 | y = -33.16x + 0.11 | Sed | 0.41 |
| DI | 782 and 835 | S-2 | y = 3.64x + 0.68 | All | 0.07 |
| RI | 1613.7 e 2204.4 | S-2 | y = -1.01 + 1.82 | Soil | 0.11 |
| RI | 1613.7 e 2202.4 | S-2 | y = 6.89x - 7.77 | Sed | 0.38 |
| RI | 782 and 740 | S-2 | y = 4.66x – 4.41 | All | 0.11 |
| NDI | 1613.7 e 2204.4 | S-2 | y = -2.6x + 0.83 | Soil | 0.11 |
| NDI | 1613.7 e 2202.4 | S-2 | y = 17.21x -1.06 | Sed | 0.38 |
| NDI | 740.2 and 782.5 | S-2 | y = -10.04x + 0.24 | All | 0.11 |
| DI | 2119 e 2290 | PRISMA | y = -19.36x + 1.28 | Soil | 0.32 |
| DI | 2143 e 2159 | PRISMA | y = -151.44x + 2.30 | Sed | 0.32 |
| DI | 1284 e 1306 | PRISMA | y = -65.30x + 2.92 | All | 0.31 |
| RI | 2290 e 2119 | PRISMA | y = 9.69x + -8.20 | Soil | 0.31 |
| RI | 2237 e 2086 | PRISMA | y = 6.59x + -5.52 | Sed | 0.82 |
| RI | 2237 e 2086 | PRISMA | y = 6.74x + -5.74 | All | 0.82 |
| NDI | 2119 e 2290 | PRISMA | y = -17.75x + 1.46 | Soil | 0.31 |
| NDI | 2086 e 2237 | PRISMA | y = -17.03x + 1.11 | Sed | 0.79 |
| NDI | 2086 e 2237 | PRISMA | y = -17.22x + 1.07 | All | 0.79 |
| DI - SG | 1262 e 1736 | PRISMA | y = 177.92x + 0.06 | Soil | 0.31 |
| DI - SG | 703 e 744 | PRISMA | y = 2894.57x + 0.16 | Sed | 0.35 |
| DI - SG | 934 e 1229 | PRISMA | y = 271.92x + 3.30 | All | 0.32 |
| RI – SG | 967 e 2135 | PRISMA | y = 0.02x + 0.57 | Soil | 0.44 |
| RI – SG | 2119 e 1841 | PRISMA | y = -10.92x + 1.54 | Sed | 0.76 |
| RI – SG | 2199 e 1904 | PRISMA | y = 3.06x + 0.36 | All | 0.75 |
| NDI – SG | 1306 e 1941 | PRISMA | y = 0.00x + 0.65 | Soil | 0.48 |
| NDI – SG | 1850 e 2127 | PRISMA | y = 1.20x + -0.06 | Sed | 0.79 |
| NDI – SG | 1850 e 2127 | PRISMA | y = 1.25x + -0.25 | All | 0.78 |
| DI - CR | 951 e 1755 | PRISMA | y = -5.16x + -0.31 | Soil | 0.27 |
| DI - CR | 1887 e 1923 | PRISMA | y = 67.16x + 1.22 | Sed | 0.76 |
| DI - CR | 1887 e 1923 | PRISMA | y = 68.87x + 0.90 | All | 0.70 |
| RI - CR | 1755 e 951 | PRISMA | y = 3.48x + -3.67 | Soil | 0.26 |
| RI - CR | 1896 e 1361 | PRISMA | y = 0.03x + 0.82 | Sed | 0.83 |
| RI - CR | 1896 e 1361 | PRISMA | y = 0.03x + 0.68 | All | 0.81 |
| NDI - CR | 951 e 1755 | PRISMA | y = -8.65x + -0.28 | Soil | 0.26 |
| NDI - CR | 1697 e 2245 | PRISMA | y = -29.38x + 0.95 | Sed | 0.74 |
| NDI - CR | 2086 e 2237 | PRISMA | y = -16.87x + -0.03 | All | 0.73 |
| DI | 434 e 444 | EnMAP | y = 111.76x + 1.07 | Soil | 0.37 |
| DI | 1749 e 1986 | EnMAP | y = -42.81x + 5.82 | Sed | 0.48 |
| DI | 692 e 1163 | EnMAP | y = 10.96x + 3.17 | All | 0.44 |
| RI | 434 e 505 | EnMAP | y = 9.14x + -6.03 | Soil | 0.42 |
| RI | 1093 e 1037 | EnMAP | y = 113.73x -117.28 | Sed | 0.71 |
| RI | 887 e 961 | EnMAP | y = 2.87x -1.98 | All | 0.57 |
| NDI | 434 e 505 | EnMAP | y = 13.55x + 2.76 | Soil | 0.41 |
| NDI | 1037 e 1093 | EnMAP | y = -238.28x -3.67 | Sed | 0.71 |
| NDI | 887 e 961 | EnMAP | y = 7.73x + 0.97 | All | 0.49 |
| DI - SG | 472 e 477 | EnMAP | y = 3257.81x + 0.35 | Soil | 0.32 |
| DI - SG | 831 e 993 | EnMAP | y = 2034.07x + 4.70 | Sed | 0.57 |
| DI - SG | 941 e 2306 | EnMAP | y = -189.37x + 2.27 | All | 0.45 |
| RI – SG | 931 e 2087 | EnMAP | y = -0.01x + 0.53 | Soil | 0.67 |
| RI – SG | 1105 e 2241 | EnMAP | y = 0.40x + 1.07 | Sed | 0.91 |
| RI – SG | 1116 e 2241 | EnMAP | y = 0.23x + 1.00 | All | 0.84 |
| NDI – SG | 1496 e 1609 | EnMAP | y = 0.01x + 0.56 | Soil | 0.67 |
| NDI – SG | 622 e 2257 | EnMAP | y = -0.34x + 0.21 | Sed | 0.84 |
| NDI – SG | 472 e 2306 | EnMAP | y = -0.16x + 0.25 | All | 0.80 |
| DI - CR | 855 e 879 | EnMAP | y = -17.00x + 0.51 | Soil | 0.26 |
| DI - CR | 1728 e 2241 | EnMAP | y = -62.70x + 1.43 | Sed | 0.79 |
| DI - CR | 1128 e 1738 | EnMAP | y = -13.73x + 0.76 | All | 0.66 |
| RI - CR | 879 e 855 | EnMAP | y = 16.56x + -16.05 | Soil | 0.26 |
| RI - CR | 2241 e 1728 | EnMAP | y = 57.33x + -55.92 | Sed | 0.79 |
| RI - CR | 2369 e 1151 | EnMAP | y = 5.57x + -5.01 | All | 0.71 |
| NDI - CR | 855 e 879 | EnMAP | y = -33.13x + 0.50 | Soil | 0.26 |
| NDI - CR | 1728 e 2241 | EnMAP | y = -118.74x + 1.42 | Sed | 0.79 |
| NDI - CR | 1128 e 1642 | EnMAP | y = -26.57x + 0.67 | All | 0.68 |
| DI | 823 and 825 | Laboratory | y = -1571.11x + -1.01 | Soil | 0.63 |
| DI | 660 and 662 | Laboratory | Y = 3119.3x + 4.48 | Sed | 0.28 |
| DI | 660 and 662 | Laboratory | Y = 3188.57x + 4.38 | All | 0.29 |
| RI | 1750 e 1749 | Laboratory | y = 518.87x - 518.25 | Soil | 0.65 |
| RI | 1891 e 1987 | Laboratory | y = 42.47x - 42.36 | Sed | 0.31 |
| RI | 1891 e 1987 | Laboratory | y = 36.79x - 36.29 | All | 0.32 |
| NDI | 1749 e 1750 | Laboratory | y = -1037.95x + 0.63 | Soil | 0.65 |
| NDI | 1891 and 1987 | Laboratory | y = 88.65x + 0.10 | Sed | 0.30 |
| NDI | 1891 and 1987 | Laboratory | Y = 75.89x + 0.51 | All | 0.31 |
| DI - SG | 922 e 941 | Laboratory | y = 15445.93x + 0.71 | Soil | 0.69 |
| DI - SG | 1358 e 1809 | Laboratory | y = 9174.73x + 1.96 | Sed | 0.17 |
| DI - SG | 1127 e 1817 | Laboratory | Y = -6309.27x + 3.31 | All | 0.17 |
| RI – SG | 1364 e 1815 | Laboratory | y = -0.04x + 0.59 | Soil | 0.83 |
| RI – SG | 2324 e 2174 | Laboratory | y = 0.46x + 2.09 | Sed | 0.33 |
| RI – SG | 2324 e 2174 | Laboratory | y = 0.46x + 1.89 | All | 0.31 |
| NDI – SG | 1285 e 1827 | Laboratory | y = -0.01x + 0.54 | Soil | 0.88 |
| NDI – SG | 1801 e 2144 | Laboratory | y = 0.21x + 2.57 | Sed | 0.38 |
| NDI – SG | 1801 e 2144 | Laboratory | y = 0.21x + 2.38 | All | 0.37 |
| DI - CR | 1123 e 1187 | Laboratory | y = 250.50x + 1.79 | Sed | 0.18 |
| DI - CR | 1123 e 1170 | Laboratory | y = 279.51x + 1.66 | All | 0.20 |
| RI - CR | 623 e 616 | Laboratory | y = 136.79x - 136.24 | Soil | 0.59 |
| RI - CR | 1123 e 1187 | Laboratory | y = 248.48x - 246.71 | Sed | 0.18 |
| RI - CR | 1123 e 1170 | Laboratory | y = 274.94x - 273.27 | All | 0.20 |
| NDI - CR | 616 e 623 | Laboratory | y = -257.18x + 0.53 | Soil | 0.55 |
| NDI - CR | 1123 e 1170 | Laboratory | y = 567.43x + 1.72 | Sed | 0.18 |
| NDI - CR | 1123 e 1170 | Laboratory | y = 551.16x + 1.67 | All | 0.20 |

Table S1. Summary of spectral indices, selected wavelengths, data sources, regression equations, data types, and coefficients of determination (R²).
